# Supplementary material
Source: Springer Nature journal article supplement (https://www.springermedizin.de/resource/supplementary/12916_2012_662_MOESM9_ESM.pdf/9597936)

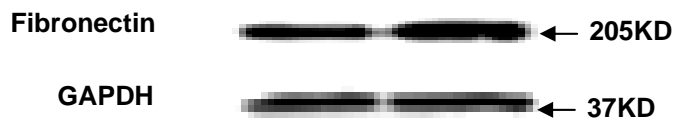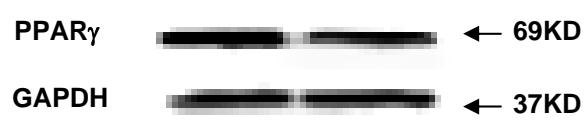

**A**

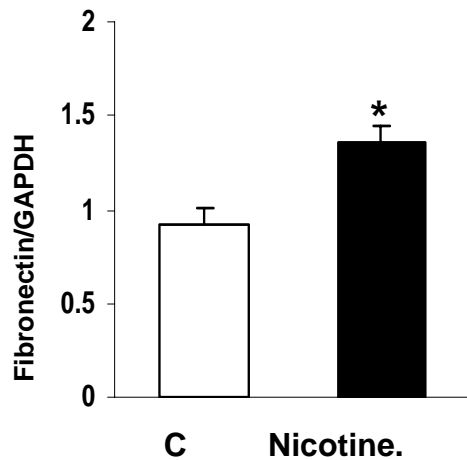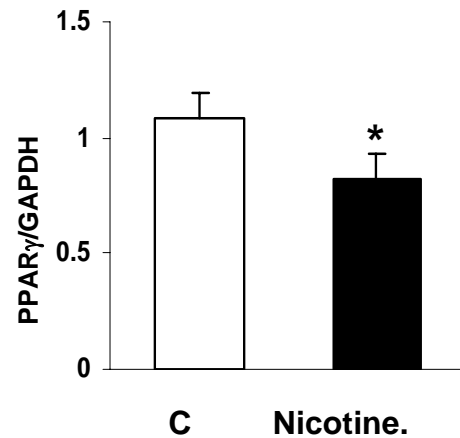

**B**

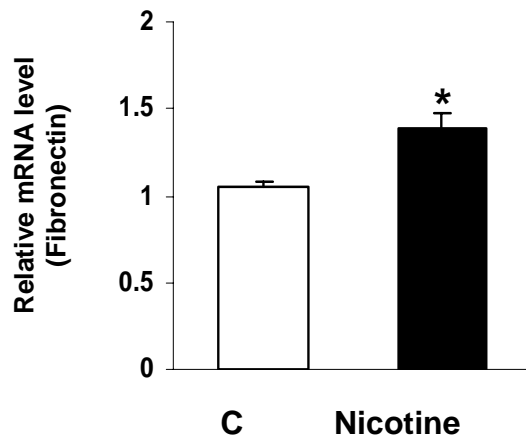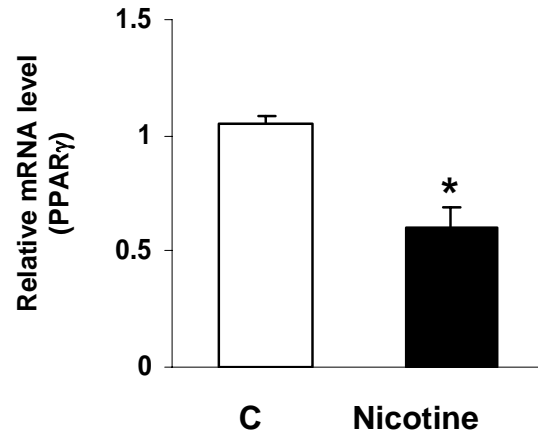

Supplement: MOESM9 [file 9597936]
